# Supplementary material for: Mono- and dinuclear copper complexes coordinated on NNO-tridentate Schiff-base derivatives for copolymerization of cyclohexene oxide and cyclic anhydrides
Source: Royal Society of Chemistry journal article supplement (doi:10.1039/c9dt00471h), 2019-01-01
Supplement: c9dt00471h1.pdf [file c9dt00471h1.pdf]

# **Mono- and dinuclear copper complexes coordinated on NNO-tridentate Schiff-base derivatives for copolymerization of cyclohexene oxide and cyclic anhydrides**

**Fu-Yin Cheng,<sup>a</sup> Chen-Yen Tsai,<sup>\*b</sup> Kuan-Yeh Lu,<sup>a</sup> Chu-Chieh Lin<sup>\*\*a</sup> and Bao-Tsan Ko<sup>\*\*a</sup>**

<sup>a</sup> Department of Chemistry, National Chung Hsing University, Taichung 402, Taiwan

<sup>b</sup> Department of Chemistry, Chinese Culture University, Taipei 111, Taiwan

\* Corresponding author. E-mail: cyz21@ulive.pccu.edu.tw (C.-Y. Tsai); Tel: 886-2-28610511-25314; cchlin@mail.nchu.edu.tw (C.-C. Lin); Tel: 886-4-22840411-718; Fax: 886-4-22862547 and E-mail: btco@dragon.nchu.edu.tw (B.-T. Ko); Tel: 886-4-22840411-715; Fax: 886-4-22862547

**Figure S1.** UV–Vis spectra of complexes **1–10** in CH<sub>2</sub>Cl<sub>2</sub> at 25 °C (a) [M]<sub>0</sub> = 20 μM, (b) [M]<sub>0</sub> = 1 mM.

**Table S1.** UV–Vis spectra of complexes **1–10** in CH<sub>2</sub>Cl<sub>2</sub> at 25 °C.

**Figure S2.** EPR spectra of complexes **2**.

**Table S2.** EPR spectra of complexes **1–10** at 25 °C.

**Figure S3.** ORTEP drawing of complex **3** with probability ellipsoids drawn at 50% level.

**Figure S4.** ORTEP drawing of complex **4** with probability ellipsoids drawn at 50% level.

**Figure S5.** ORTEP drawing of complex **6** with probability ellipsoids drawn at 50% level.

**Figure S6.** ORTEP drawing of complex **7** with probability ellipsoids drawn at 50% level.

**Figure S7.** ORTEP drawing of complex **8** with probability ellipsoids drawn at 50% level.

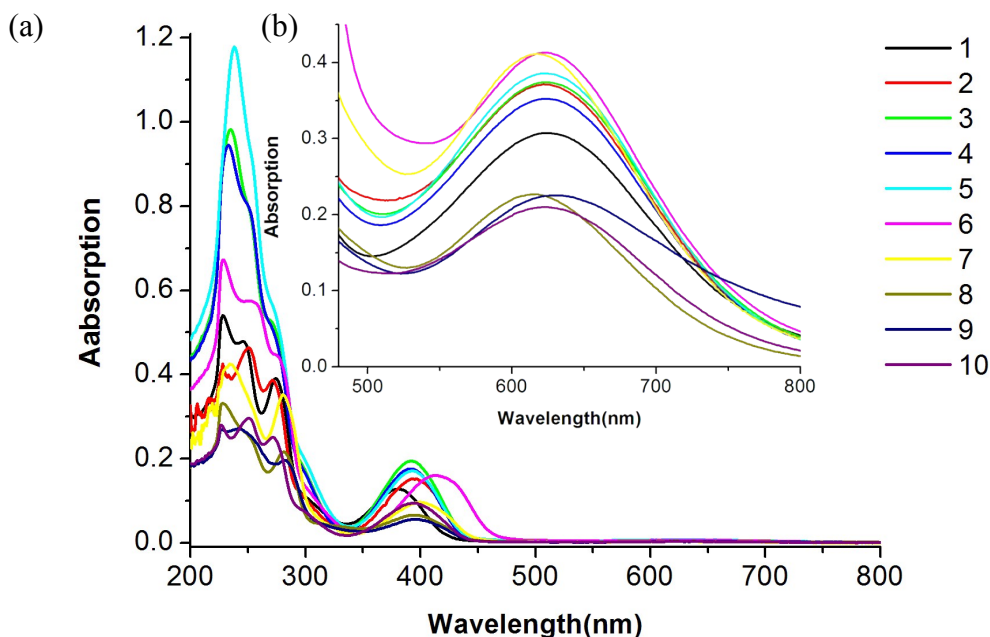

**Figure S1.** UV-Vis spectra of complexes **1–10** in  $\text{CH}_2\text{Cl}_2$  at 25 °C (a)  $[\text{M}]_0 = 20\mu\text{M}$ , (b)  $[\text{M}]_0 = 1\text{mM}$ .

**Table S1.** UV-Vis spectra of complexes **1–10** in  $\text{CH}_2\text{Cl}_2$  at 25 °C.

| Complex                                                         | $\lambda_{\text{max,abs.}}(\text{nm})(\epsilon/10^4 \text{ M}^{-1}\text{cm}^{-1})$ | d-d, (nm)<br>( $\epsilon/\text{M}^{-1}\text{cm}^{-1}$ ) |
|-----------------------------------------------------------------|------------------------------------------------------------------------------------|---------------------------------------------------------|
| (1): $[(\text{L}^1)_2\text{Cu}_2(\text{OAc})_2]$                | 228(2.70) 246(2.39) 274(1.96) 381(0.64)                                            | 623(307.4)                                              |
| (2): $[(\text{L}^2)_2\text{Cu}_2(\text{OAc})_2]$                | 228(2.12) 251(2.32) 271(1.93) 394(0.76)                                            | 622(371.6)                                              |
| (3): $[(\text{L}^3)_2\text{Cu}_2(\text{OAc})_2]$                | 235(4.91) 252(3.91) 270(2.64) 392(0.97)                                            | 623(374.1)                                              |
| (4): $[(\text{L}^4)_2\text{Cu}_2(\text{OAc})_2]$                | 233(4.72) 251(3.98) 272(2.51) 391(0.88)                                            | 623(352.4)                                              |
| (5): $[(\text{L}^5)_2\text{Cu}_2(\text{OAc})_2]$                | 238(5.89) 253(4.60) 274(2.71) 393(0.85)                                            | 623(385.8)                                              |
| (6): $[(\text{L}^6)_2\text{Cu}_2(\text{OAc})_2]$                | 228(3.36) 251(2.88) 273(2.24) 412(0.80)                                            | 623(413.0)                                              |
| (7): $[(\text{L}^7)_2\text{Cu}_2(\text{OAc})_2]$                | 234(2.13) 255(1.57) 280(1.76) 400(0.49)                                            | 617(411.6)                                              |
| (8): $[(\text{L}^8)\text{Cu}(\text{OAc})]$                      | 228(1.66) 249(1.29) 281(1.08) 396(0.33)                                            | 615(227.0)                                              |
| (9): $[(\text{L}^9)\text{Cu}(\text{OAc})]$                      | 227(1.34) 241(1.35) 281(0.98) 396(0.28)                                            | 631(225.6)                                              |
| (10): $[(\text{L}^2)\text{Cu}(\text{OAc})(\text{H}_2\text{O})]$ | 227(1.40) 251(2.98) 271(1.25) 395(0.47)                                            | 621(210.1)                                              |

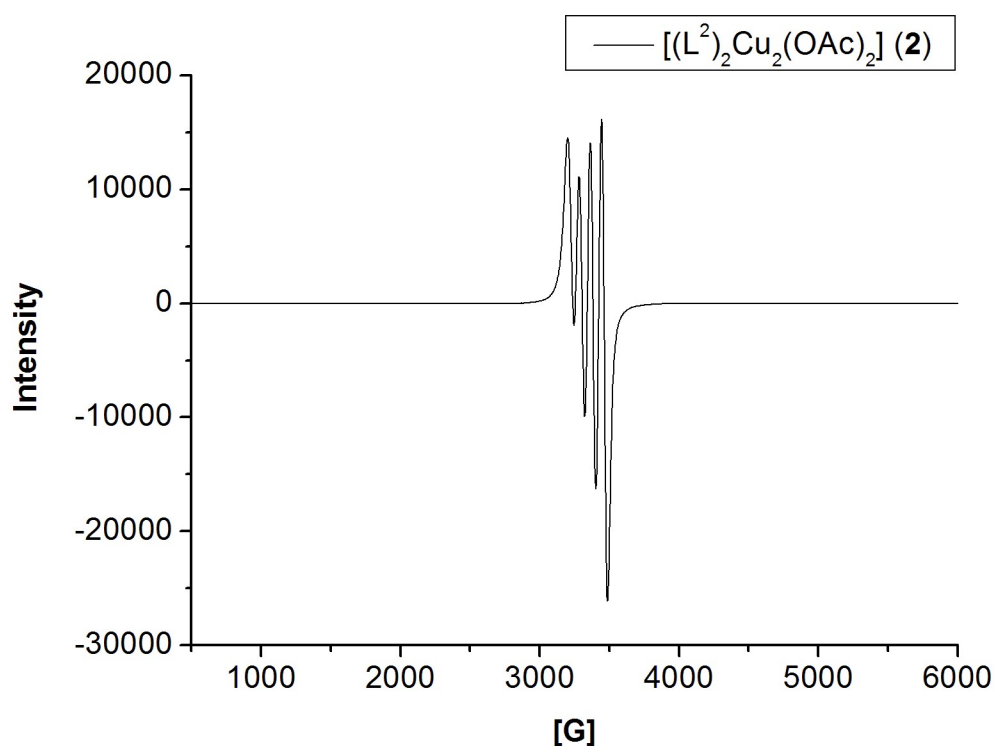

**Figure S2.** EPR spectra of complexes **2**.

**Table S2.** EPR spectra of complexes **1–10** at 25 °C.

| Complex                             | g-factor | magnetic ( $\mu$ ) <sup>a</sup> |
|-------------------------------------|----------|---------------------------------|
| <b>(1)</b> : $[(L^1)_2Cu_2(OAc)_2]$ | 2.0382   | 1.7651                          |
| <b>(2)</b> : $[(L^2)_2Cu_2(OAc)_2]$ | 2.0370   | 1.7641                          |
| <b>(3)</b> : $[(L^3)_2Cu_2(OAc)_2]$ | 2.0379   | 1.7649                          |
| <b>(4)</b> : $[(L^4)_2Cu_2(OAc)_2]$ | 2.0375   | 1.7645                          |
| <b>(5)</b> : $[(L^5)_2Cu_2(OAc)_2]$ | 2.0386   | 1.7654                          |
| <b>(6)</b> : $[(L^6)_2Cu_2(OAc)_2]$ | 2.0389   | 1.7657                          |
| <b>(7)</b> : $[(L^7)_2Cu_2(OAc)_2]$ | 2.0275   | 1.7556                          |
| <b>(8)</b> : $[(L^8)Cu(OAc)]$       | 2.0345   | 1.7619                          |
| <b>(9)</b> : $[(L^9)Cu(OAc)]$       | 2.0372   | 1.7643                          |

---

**(10):** $[(L^2)Cu(OAc)(H_2O)]$ 

2.0382

1.7651

---

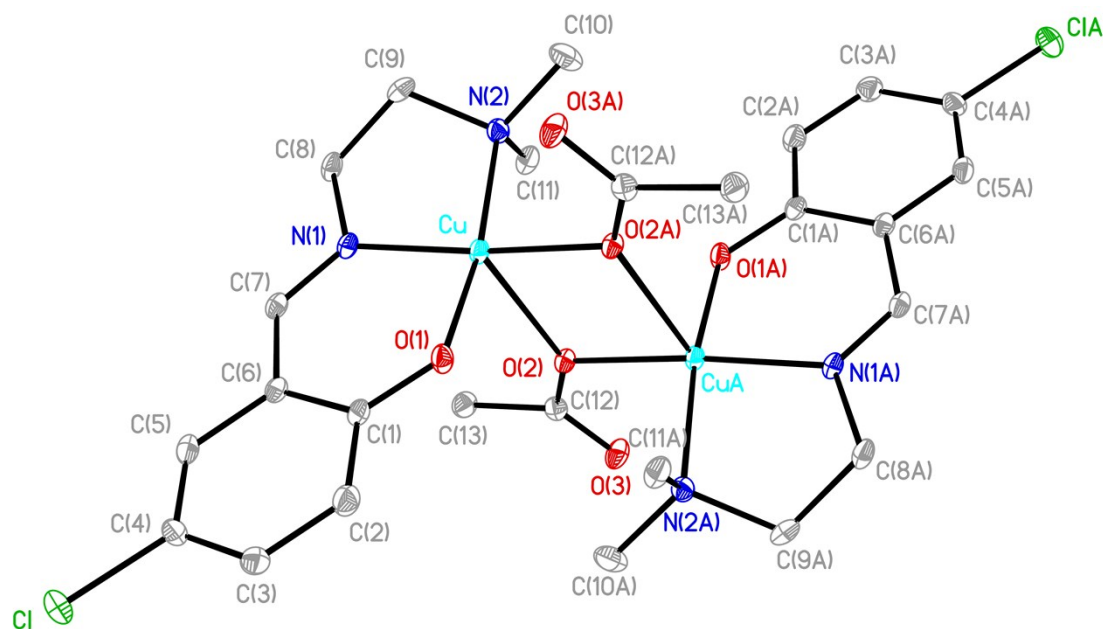

**Figure S3.** ORTEP drawing of complex **3** with probability ellipsoids drawn at 50% level.

Hydrogen atoms are omitted for clarity. Selected bond lengths (Å) and angles (deg): Cu-O(1) 1.937(2), Cu-N(1) 1.953(2), Cu-O(2)A 1.9603(17), Cu-N(2) 2.105(2), Cu-O(2) 2.3468(18), O(1)-Cu-N(1) 91.12(9), O(1)-Cu-O(2)A 89.17(8), N(1)-Cu-O(2)A 173.64(8), O(1)-Cu-N(2) 170.78(8), N(1)-Cu-N(2) 83.45(9), O(2)A-Cu-N(2) 95.41(8), O(1)-Cu-O(2) 89.30(7), N(1)-Cu-O(2) 109.05(8), O(2)A-Cu-O(2) 77.30(8), N(2)-Cu-O(2) 99.50(8).

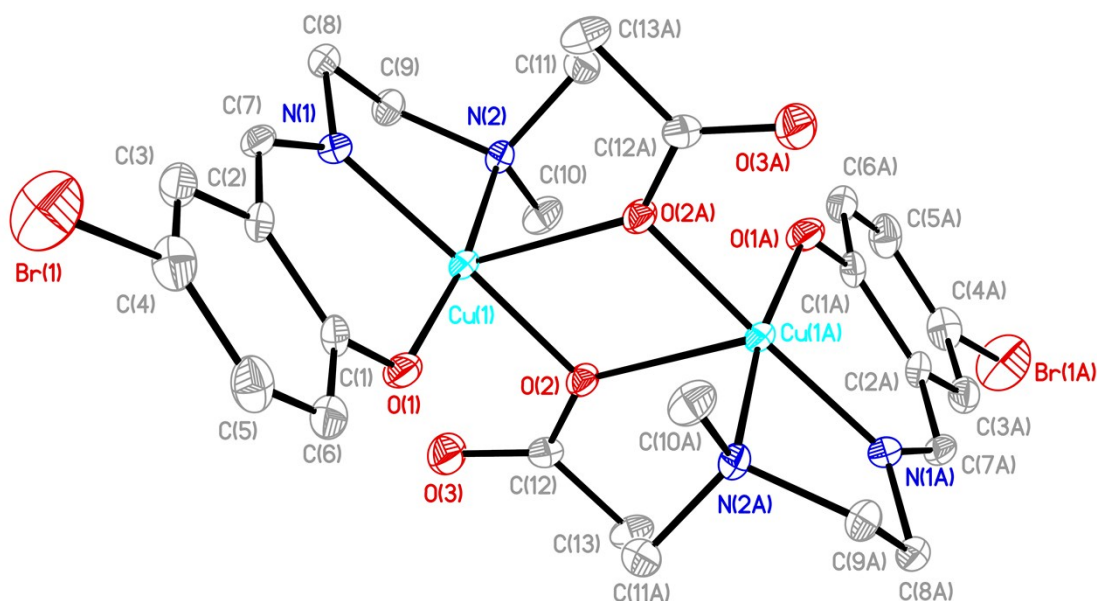

**Figure S4.** ORTEP drawing of complex **4** with probability ellipsoids drawn at 50% level. Hydrogen atoms are omitted for clarity. Selected bond lengths (Å) and angles (deg): Cu(1)-O(1) 1.9435(17), Cu(1)-O(2) 1.9574(17), Cu(1)-N(1) 1.961(2), Cu(1)-N(2) 2.097(2), Cu(1)-O(2)A 2.4073(16), O(1)-Cu(1)-O(2) 90.99(7), O(1)-Cu(1)-N(1) 91.04(8), O(2)-Cu(1)-N(1) 174.90(8), O(1)-Cu(1)-N(2) 171.57(7), O(2)-Cu(1)-N(2) 94.71(7), N(1)-Cu(1)-N(2) 82.78(8), O(1)-Cu(1)-O(2)A 88.93(7), O(2)-Cu(1)-O(2)A 74.71(7), N(1)-Cu(1)-O(2)A 110.00(7), N(2)-Cu(1)-O(2)A 98.56(7).

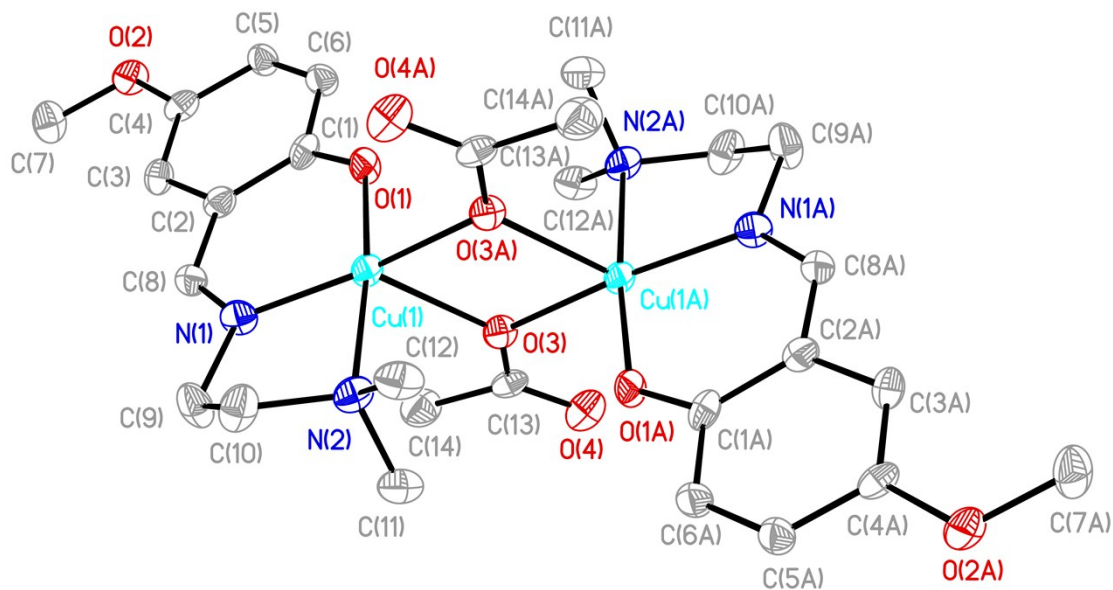

**Figure S5.** ORTEP drawing of complex **6** with probability ellipsoids drawn at 50% level. Hydrogen atoms are omitted for clarity. Selected bond lengths (Å) and angles (deg): Cu(1)-O(1) 1.924(3), Cu(1)-O(3A) 1.963(3), Cu(1)-N(1) 1.962(4), Cu(1)-N(2) 2.114(4), Cu(1)-O(3) 2.354(3), O(1)-Cu(1)-O(3A) 90.75(13), O(1)-Cu(1)-N(1) 91.69(13), O(3A)-Cu(1)-N(1) 170.32(13), O(1)-Cu(1)-N(2) 174.31(13), O(3A)-Cu(1)-N(2) 94.19(14), N(1)-Cu(1)-N(2) 82.97(14), O(1)-Cu(1)-O(3) 87.66(12), O(3A)-Cu(1)-O(3) 74.36(13), N(1)-Cu(1)-O(3) 115.10(14), N(2)-Cu(1)-O(3) 96.38(13).

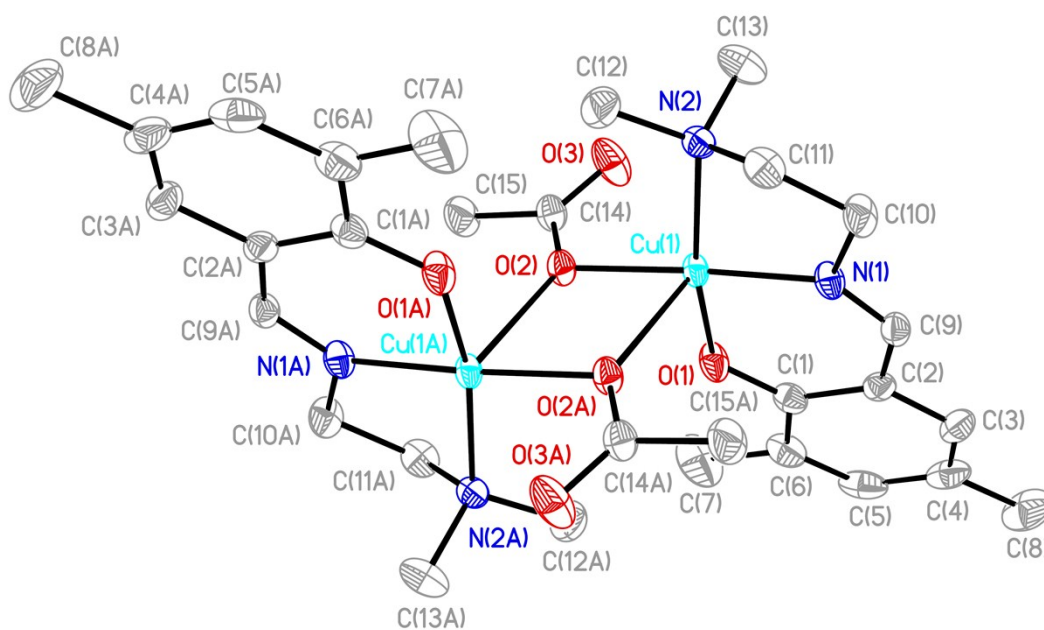

**Figure S6.** ORTEP drawing of complex **7** with probability ellipsoids drawn at 50% level. Hydrogen atoms are omitted for clarity. Selected bond lengths (Å) and angles (deg): Cu(1)-O(1) 1.9193(15), Cu(1)-N(1) 1.9467(18), Cu(1)-O(2), 1.9636(14), Cu(1)-N(2) 2.0762(17), O(1)-Cu(1)-N(1) 91.97(7), O(1)-Cu(1)-O(2) 88.94(6), N(1)-Cu(1)-O(2) 174.91(6), O(1)-Cu(1)-N(2) 164.52(7), N(1)-Cu(1)-N(2) 82.60(7), O(2)-Cu(1)-N(2) 97.75(7).

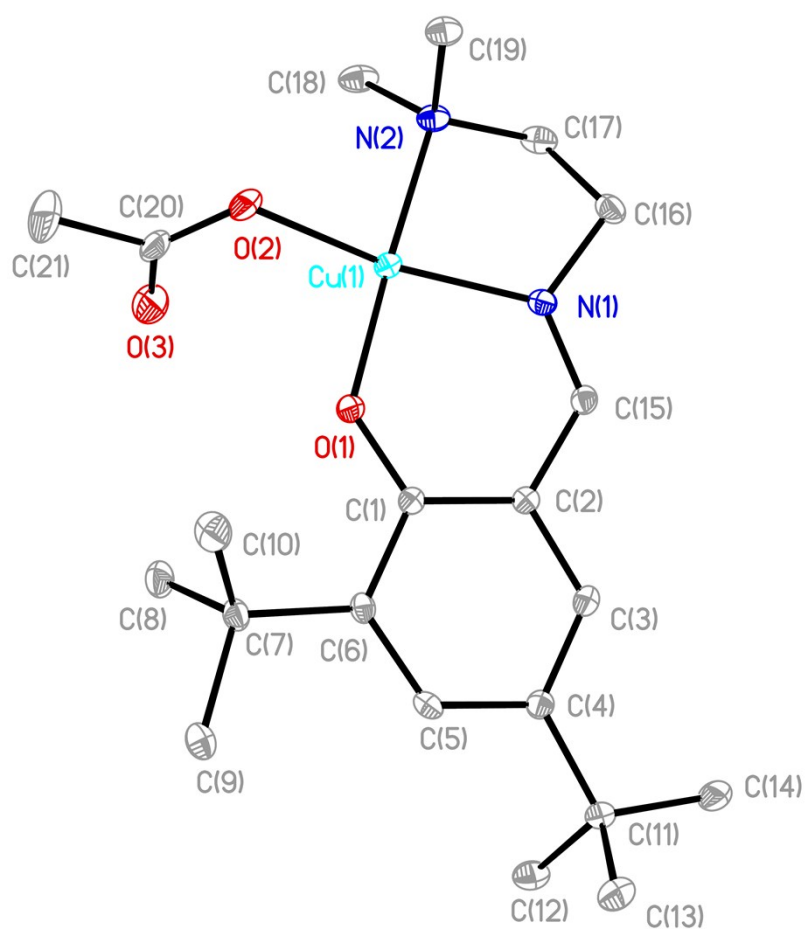

**Figure S7.** ORTEP drawing of complex **8** with probability ellipsoids drawn at 50% level. Hydrogen atoms are omitted for clarity. Selected bond lengths (Å) and angles (deg): Cu(1)-O(1) 1.903(2), Cu(1)-N(1) 1.928(3), Cu(1)-O(2) 1.951(3), Cu(1)-N(2) 2.051(3), O(1)-Cu(1)-N(1) 92.48(11), O(1)-Cu(1)-O(2) 89.10(11), N(1)-Cu(1)-O(2) 161.03(11), O(1)-Cu(1)-N(2) 177.62(11), N(1)-Cu(1)-N(2) 85.22(12), O(2)-Cu(1)-N(2) 92.86(12).
